# Supplementary material
Source: PubMed Central journal article supplement (PMC8044012)
Supplement: NIHMS1664460-supplement-3.pdf [file NIHMS1664460-supplement-3.pdf]

**A**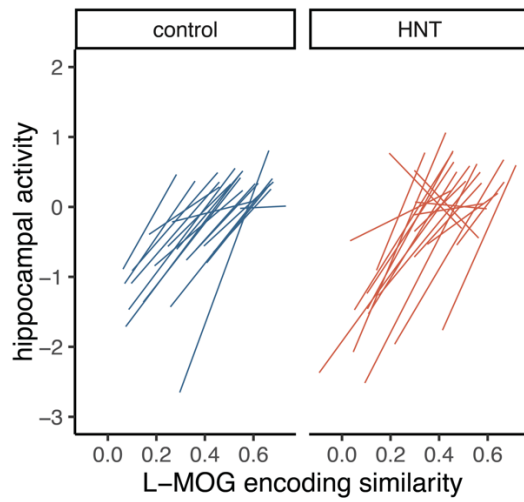**B**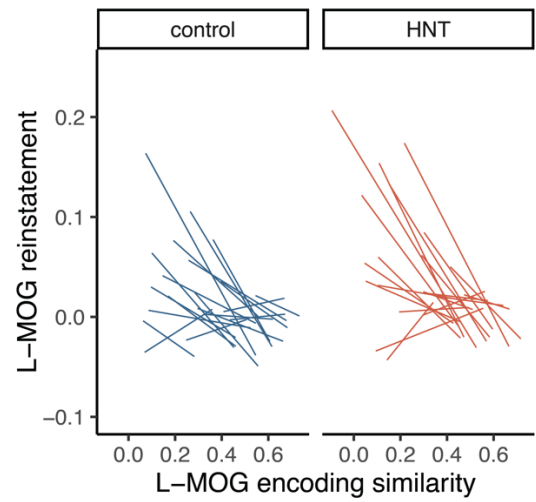

**Figure S1. Effects of encoding similarity on hippocampal contributions to reinstatement. Related to Figure 4.** (A) Within-subjects correlation between average left hippocampal activity at encoding and encoding similarity in left medial occipital gyrus for control and HNT stimulation plotted separately. (B) Within-subjects correlation between encoding similarity and reinstatement in left medial occipital gyrus for control and HNT stimulation. Each line represents an individual participant's correlation for a given session.
